# Supplementary material
Source: PubMed Central journal article supplement (PMC4130388)
Supplement: NIHMS573991-supplement-Supp_Figures1-S4.pdf [file NIHMS573991-supplement-Supp_Figures1-S4.pdf]

# **Proton-dependent zinc release from intracellular ligands**

Lech Kiedrowski

## **Supporting Information**

**Supplementary Figures S1 – S4**

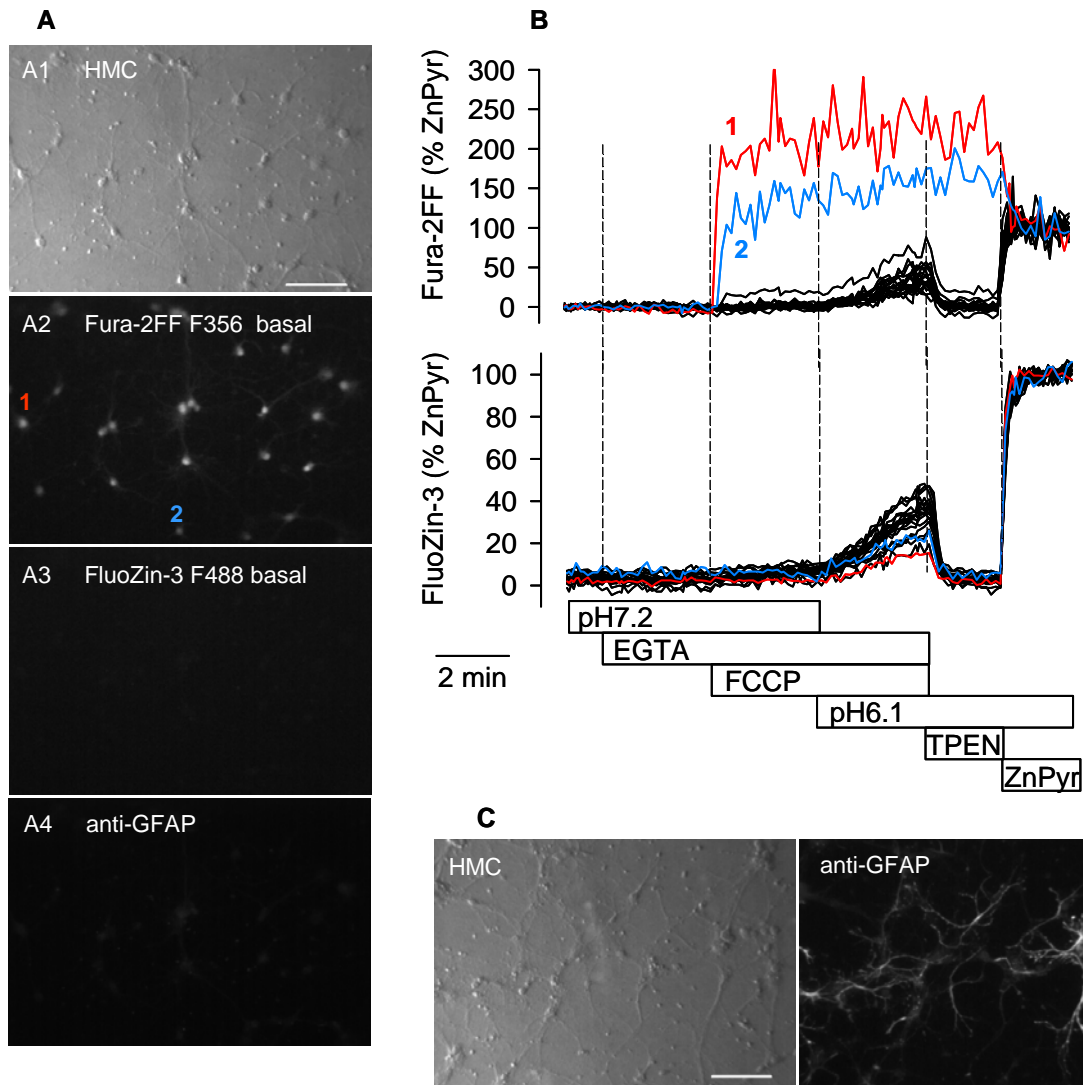

**Fig. S1** Simultaneous monitoring of Fura-2FF and FluoZin-3 fluorescence in hippocampal cultures. To improve culture viability, glial proliferation was not prevented and, therefore, astrocytes were sometimes encountered in the field in which the Fura-2FF and FluoZin-3 fluorescence was monitored. The astrocytes were identified with anti-GFAP antibody after the experiments. **A**, Images from an experiment in which astrocytes were not detected: A1, Hoffman modulation contrast (HMC). A2, Basal Fura-2FF fluorescence excited at 356 nm (isosbestic point). A3, Basal FluoZin-3 fluorescence excited at 488 nm; no fluorescence is visible because the cells were loaded with very low amounts of FluoZin-3 such that the maximal fluorescence (when the probe was saturated with  $Zn^{2+}$ ) did not exceed the dynamic range of the camera. A4, anti-GFAP fluorescence in the same field; the lack of fluorescence indicates that astrocytes were not present in this field. **B**, The Fura-2FF and FluoZin-3 data from the cells shown in A. Indicated in the legend are: extracellular pH (7.2 or 6.1), superfusion with  $Ca^{2+}$ -free and  $Zn^{2+}$ -free medium (EGTA), and applications of 3  $\mu$ M FCCP and 10  $\mu$ M TPEN. At the end of the experiment, 100  $\mu$ M  $ZnCl_2$  plus 20  $\mu$ M pyrithione (ZnPyr) was applied to saturate Fura-2FF and FluoZin-3 with  $Zn^{2+}$ . Marked 1 (red) and 2 (blue) are two cells showing an FCCP-induced irreversible destabilization of  $Ca^{2+}$  homeostasis. Data from such cells were routinely excluded when typical data were averaged. **C**, Images from a culture in which astrocytes were detected. The cultures shown in A and C are sister cultures at day-in-vitro 16. Bar = 100  $\mu$ m.

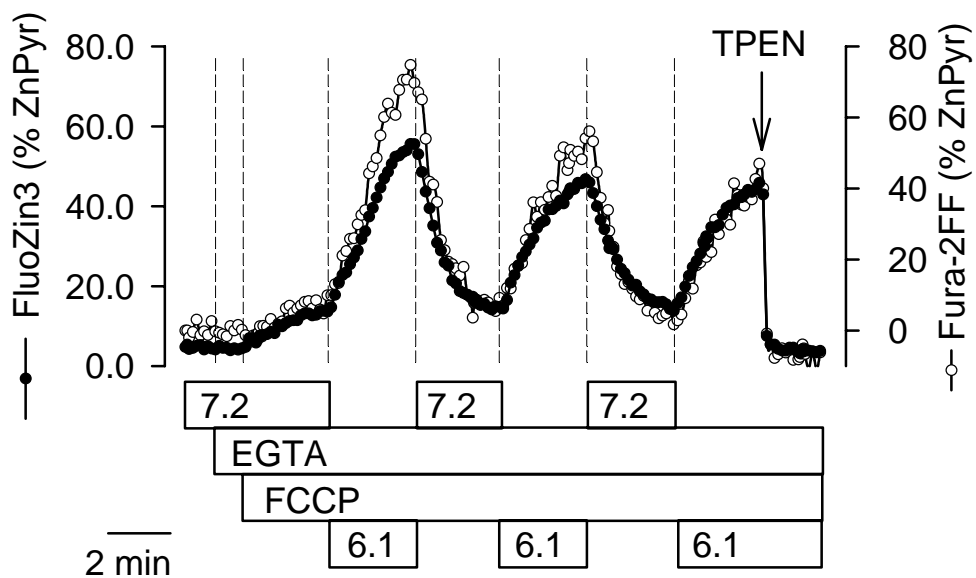

**Fig. S2** Effects of acid pulses on the Fura-2FF and FluoZin-3 signals in hippocampal neurons. The acid pulses (pH 6.1) were applied using a  $Zn^{2+}$  and  $Ca^{2+}$ -free medium (100  $\mu$ M EGTA) supplemented with 3  $\mu$ M FCCP. Experimental details are the same as described in Fig. 1a. The data are means (24 neurons) from a single experiment that was repeated six times with similar results

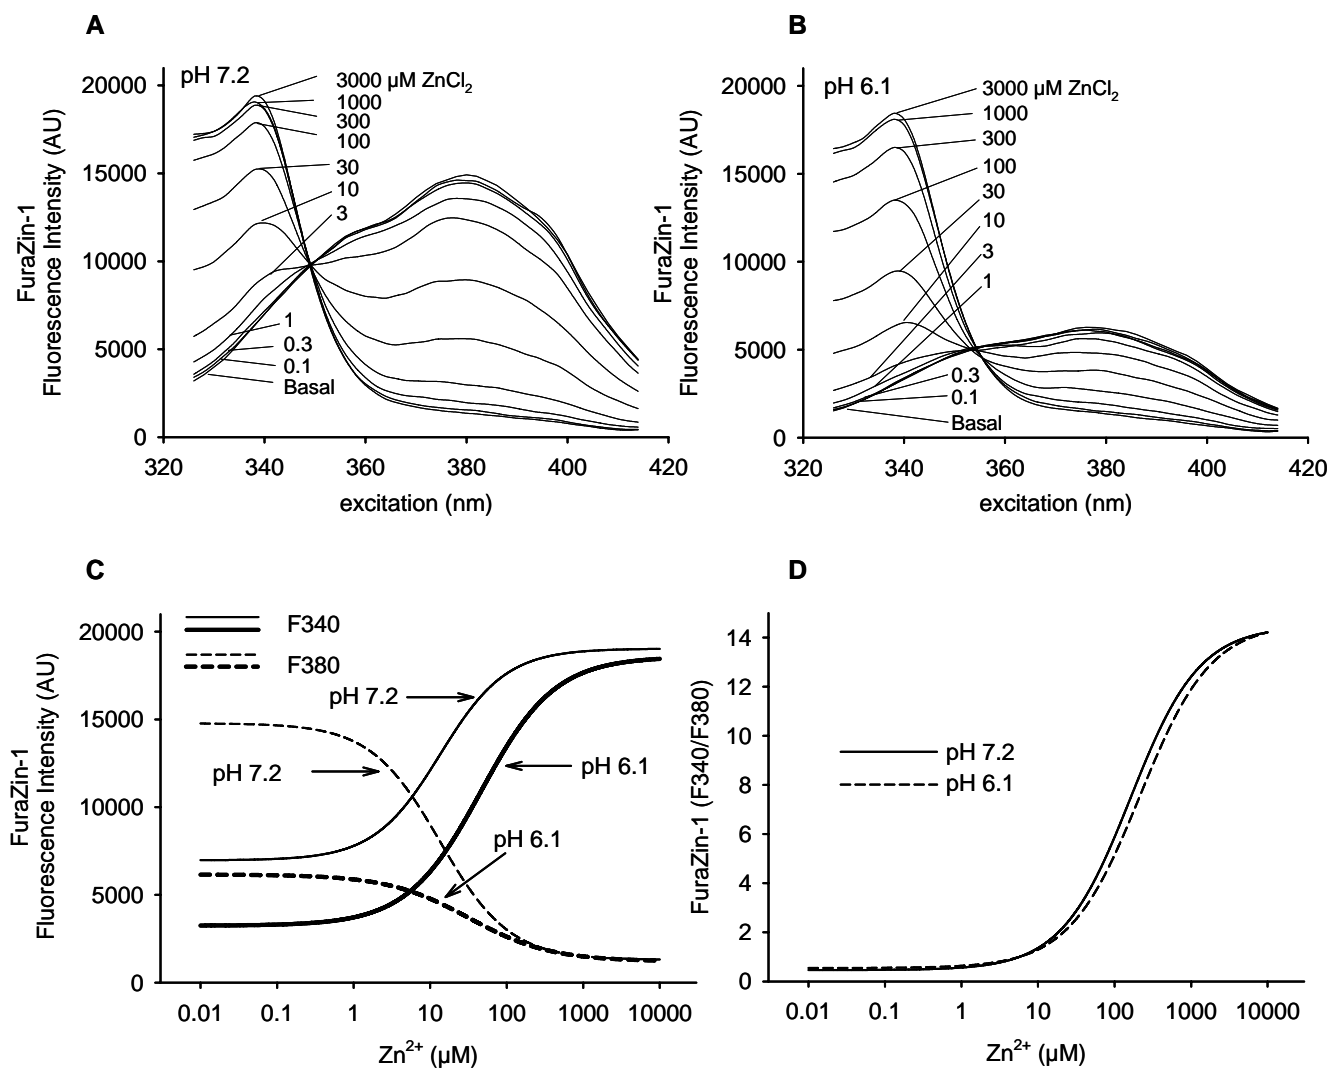

**Fig. S3** Effects of  $[Zn^{2+}]$  and pH on FuraZin-1 fluorescence. **A**, Excitation spectra at pH 7.2. **B**, Excitation spectra at pH 6.1. The Basal in A and B refers to solutions not supplemented with  $Zn^{2+}$ ; these solutions contained 100 nM FuraZin-1, 100 mM KCl, and 50 mM PIPES. **C**, The impact of  $[Zn^{2+}]$  and pH on the FuraZin-1 fluorescence excited at 340 nm (F340) and 380 nm (F380). **D**, FuraZin-1 F340/F380 ratios calculated from the data in C.

The FuraZin-1  $Zn^{2+}$   $K_d$  values determined from the F340 data at pH 7.2 and 6.1 shown in C were 13  $\mu M$  and 39  $\mu M$ , respectively; the dissociation constant  $K'_d$  values determined from the FuraZin-1 F340/F380 ratios at pH 7.2 and 6.1 shown in D were 174 and 216  $\mu M$ , respectively. The difference between the  $K'_d$  and  $K_d$  stems from the fact that  $K'_d = K_d \times S_{f2}/S_{b2}$ , where  $S_{f2}$  and  $S_{b2}$  are the F380 values of  $Zn^{2+}$ -free and  $Zn^{2+}$ -saturated FuraZin-1, respectively (Grynkiewicz et al. 1985, J. Biol. Chem. 260, 3440-3450).

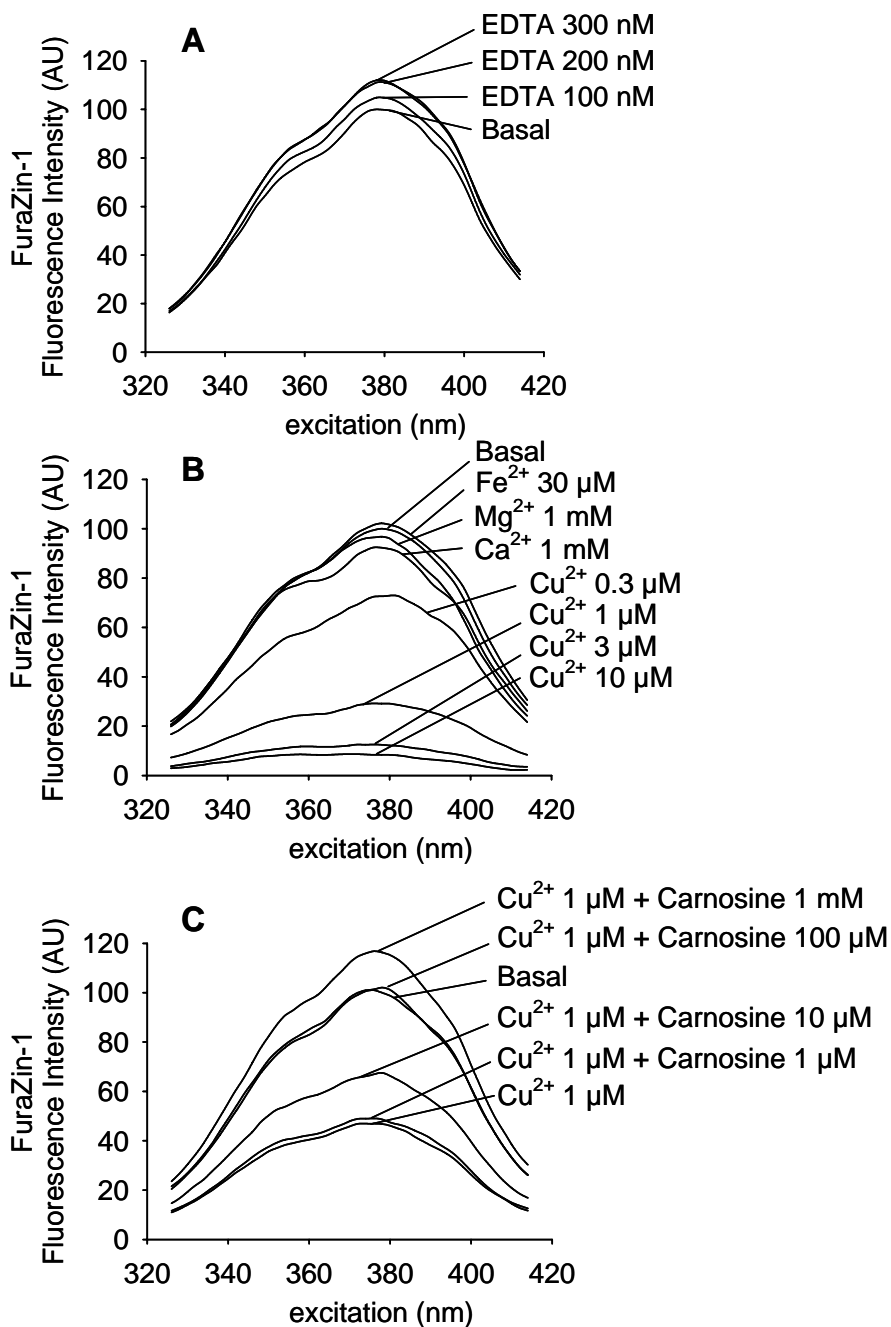

**Fig. S4** Carnosine prevents FuraZin-1 fluorescence quenching by copper. **A**, EDTA chelates a contaminating ion that quenches FuraZin-1 fluorescence. Note that an addition of up to 200 nM EDTA boosts the fluorescence. **B**, Cu<sup>2+</sup> (but not Ca<sup>2+</sup>, Mg<sup>2+</sup>, or Fe<sup>2+</sup>) quenches FuraZin-1 fluorescence (in all cases, chloride salts were tested); effects of higher than 30 μM Fe<sup>2+</sup> could not be tested because of precipitation. **C**, Carnosine dose-dependently removes the Cu<sup>2+</sup>-induced quenching of FuraZin-1 fluorescence. In all panels, the Basal refers to a solution containing 100 nM FuraZin-1, 100 mM KCl, and 50 mM PIPES (pH 7.2) without supplements.
